# Supplementary material
Source: MDPI journal article supplement (https://www.mdpi.com/1424-8247/15/6/659)
Supplement: s1 [file s1]

# Supporting Information

## Structural elucidation of Rift Valley Fever Virus L protein towards the discovery of its potential inhibitors

Mubarak A. Alamri<sup>1,†</sup>, Muhammad Usman Mirza<sup>2,†</sup>, Muhammad Muzammal Adeel<sup>3,†</sup>, Usman Ali Ashfaq<sup>4</sup>, Muhammad Tahir ul Qamar<sup>\*,4</sup>, Farah Shahid<sup>4</sup>, Sajjad Ahmad<sup>5</sup>, Eid A. Alatawi<sup>6</sup>, Ghadah M. Albalawi<sup>7,8</sup>, Khaled S Allemailem<sup>7,\*</sup> and Ahmad Almatroudi<sup>7</sup>

<sup>1</sup> Department of Pharmaceutical Chemistry, College of Pharmacy, Prince Sattam Bin Abdulaziz University, Al-Kharj, Saudi Arabia; m.alamri@psau.edu.sa

<sup>2</sup> Department of Chemistry and Biochemistry, University of Windsor, Windsor, Canada; mumirza@uwindsor.ca

<sup>3</sup> 3D Genomics Research Center, College of Informatics, Huazhong Agricultural University, Wuhan, China; m.muzammal.adeel@outlook.com

<sup>4</sup> Department of Bioinformatics and Biotechnology, Government College University Faisalabad, Faisalabad 38000, Pakistan; usmancemb@gmail.com (U.A.A.); tahirulqamar@gcuf.edu.pk (M.T.Q.); farahshahid24@gcuf.edu.pk (F.S.)

<sup>5</sup> Department of Health and Biological Sciences, Abasyn University, Peshawar, Pakistan; sajjad.ahmad@abasyn.edu.pk

<sup>6</sup> Department of Medical Laboratory Technology, Faculty of Applied Medical Sciences, University of Tabuk, Tabuk 71491, Saudi Arabia; eid.alatawi@ut.edu.sa

<sup>7</sup> Department of Medical Laboratories, College of Applied Medical Sciences, Qassim University, Buraydah 51452, Saudi Arabia; galbalawi080@gmail.com (G.M.A.); k.allemailem@qu.edu.sa (K.S.A.); aamtrody@qu.edu.sa (A.A.)

<sup>8</sup> Department of Laboratory and Blood Bank, King Fahd Specialist Hospital, Tabuk 47717, Saudi Arabia.

† These authors contributed equally to this study.

\* Correspondence: tahirulqamar@gcuf.edu.pk (M.T.Q.); k.allemailem@qu.edu.sa (K.S.A.)

|          |                                                               |                                                 |                   |     |
|----------|---------------------------------------------------------------|-------------------------------------------------|-------------------|-----|
| RVFV_L   | sequencequery----                                             | MDSILSK--QLVDKTGFVRVPIKHFDCTMLTLALPTFDVSKMV     | 54                |     |
| 6L42_0_0 | --structureL-FIRSTX-----                                      | -----GLPDLDDVTVD                                | 27                |     |
| 6Y6K_1_0 | --structureYKFIRSTX-----                                      | -----GLPDLDDVTVD                                | 28                |     |
|          | . . * *                                                       | ** .** :*: .                                    |                   |     |
| RVFV_L   | DRITIDFNLDIQQGASEIGSTLLPSM-SIDVEDMANFVHDFTFGHLADKTDRLLMREFPM  |                                                 | 113               |     |
| 6L42_0_0 | TGVTVDIGAVP-DSAS-----                                         | SEAYKINHDTFSGLSKTTDRRLSEVFP                     | 71                |     |
| 6Y6K_1_0 | TGVTVDIGAVP-DSASQLGSSINAGLITIQ                                | SEAYKINHDTFSGLSKTTDRRLSEVFP                     | 87                |     |
|          | :*:*. . :.**                                                  | .: : : ***** . *:..** * . **:                   |                   |     |
| RVFV_L   | MNDGFDHLSPDMI IKTTSGVYNIVEFTNFRGDERGAFQAAM- IKLAKYEVPCENRS--- | Q                                               | 169               |     |
| 6L42_0_0 | THDGS DGMTPDVIHTRLDGTIVVVEFTTTRSHNIGGLEAAYRTKIEKYRDPISRRVDIME |                                                 | 131               |     |
| 6Y6K_1_0 | THDGS DGMTPDVIHTRLDGTIVVVEFTTTRSHNIGGLEAAYRTKIEKYRDPISRRVDIME |                                                 | 147               |     |
|          | :** * :*:*. . .*. :****. *:..* :*:** *: ** . * ..* :          |                                                 |                   |     |
| RVFV_L   | GRTVVLYVVSAYRAWCMVYLELERTLKQREM VYRYRLALSVMDELRTLFP--         | ELSSTDEE                                        | 227               |     |
| 6L42_0_0 | NPRVFFGVIVVSSGGVLSNMPLTQD-EAEELMYRFCIANEIYTKARSMADIELQKSEEE   |                                                 | 190               |     |
| 6Y6K_1_0 | NPRVFFGVIVVSSGGVLSNMPLTQD-EAEELMYRFCIANEIYTKARSMADIELQKSEEE   |                                                 | 206               |     |
|          | . *: . * : . . : : * : : .*:***: * .: : * : : **..:***        |                                                 |                   |     |
| RVFV_L   | LGKTERELPAMVSSIQINWSVTESVFPF SREMFD RFRSSPPDSEYITRIVSRCLINSQE |                                                 | 287               |     |
| 6L42_0_0 | LEAISRAL-SFFSLFEPNIERVEGTFPNSEIEMLEQFLSTPADVDFITKTLKAKEVEAYA  |                                                 | 249               |     |
| 6Y6K_1_0 | LEAISRAL-SFFSLFEPNIERVEGTFPNSEIEMLEQFLSTPADVDFITKTLKAKEVEAYA  |                                                 | 265               |     |
|          | * . * * :*: . : * . .*.** . :*:** * : * * :*: : . : :         |                                                 |                   |     |
| RVFV_L   | KLINSSFFAEGNDKALRF SKNAEECSLAVERALNQYRAEDNLRDLNDHKSTIQ        | LPPWLSY                                         | 347               |     |
| 6L42_0_0 | DLCDSHYLKPEKTIQERLEINRCEAIDKTQDLLAGLHARSN-KQTS                | LNRGTVKLPWLPK                                   | 308               |     |
| 6Y6K_1_0 | DLCDSHYLKPEKTIQERLEINRCEAIDKTQDLLAGLHARSN-KQTS                | LNRGTVKLPWLPK                                   | 324               |     |
|          | . * : * : : : * : . * . .: * : * : . : . : : : : *****        |                                                 |                   |     |
| RVFV_L   | HDVDGKDLCPQLQGLDVRGDH-PMC NLWREVVTSANLEEIERMHDDAAAELEFAFGS--- | K                                               | 403               |     |
| 6L42_0_0 | PSSSIDIKTDSGFGSLMDHGAYGELWAKCLLDVSLGNVEGVVSDP--               | ELDIA-----                                      | 359               |     |
| 6Y6K_1_0 | PSS-----                                                      | GAYGELWAKCLL-----                               | 339               |     |
|          | . : ** : :                                                    | ***                                             |                   |     |
| RVFV_L   | GQARE-RNRYHRVHLNMGSDVLVYIAALGVNGKKHK---                       | ADTLVQQMRDRSKQPFSP---                           | 456               |     |
| 6L42_0_0 | DTPKEAKITYRRFK---                                             | PALSSSARQEFSLQG-----                            | LSPFLD            | 394 |
| 6Y6K_1_0 | -----                                                         | SHETLSP---                                      | FLD               | 349 |
|          |                                                               | ***                                             |                   |     |
| RVFV_L   | DHDVITYLNF-S-LHALVTCGQOMRTCT--                                | ALSLVIRDSVGSPEDSSAILVRKGFHEIIT                  | 512               |     |
| 6L42_0_0 | VEDIGDFLT-FNNLLADSRYGDE-SVQR--                                | AVSILL-----                                     | EKASAMQDTELTHALND | 443 |
| 6Y6K_1_0 | VEDIGDFLT-FNNLLTDSRYGDESIQ---                                 | RAVSILL-----                                    | EKASAMQDTELTHALND | 398 |
|          | .*: :*. . * : :*: * *:***: * :*: : : * :                      |                                                 |                   |     |
| RVFV_L   | EHYKFMGSRIGHGCMVSLIGAEL SASVKQHVKPNYFVIKRLLGSGIFLLIKPTSSKSHI  |                                                 | 572               |     |
| 6L42_0_0 | SFKRNLSSNVVQWSLWVSLAQELASALKQHCRAGEFIIKKLKF                   | WPIYVVIKPTKSSSHI                                | 503               |     |
| 6Y6K_1_0 | SFKRNLSSNVVQWSLWVSLAQELASALKQHCRAGEFIIKKLKF                   | WPIYVVIKPTKSSSHI                                | 458               |     |
|          | .. : :*. : : . ** : . *****: * . *:***. * :*:*****.***        |                                                 |                   |     |
| RVFV_L   | FVSFALSALAGPLISPLPG-FSSPTKMLGILLVTD                           | FVSYKLSKLTNLCKCVSLMESSFSF                       | 631               |     |
| 6L42_0_0 | F--YSLGIRKADVTRRLTGRVFS                                       | ETIDAGEWELTEFKSLKTKCLTNLVNLPCTMLNSIAF           | 561               |     |
| 6Y6K_1_0 | F--YSLGIRKADVTRRLTGRVFS                                       | ETIDAGEWELTEFKSLKTKCLTNLVNLPCTMLNSIAF           | 516               |     |
|          | * :*: . . : * * . * * * :*: * * .*****: . * .*:*              |                                                 |                   |     |
| RVFV_L   | WAEAFGIQAGTLVGDFVPRSSDSAAMDASYMGKLSLLTLEDKAATEELQTIARYIIMEG   |                                                 | 691               |     |
| 6L42_0_0 | WREKLGV-----                                                  | APWLVRKPCSELREQVGLTFLISLEDKSKTEEIIITLTRYTQMEG   | 612               |     |
| 6Y6K_1_0 | WREKLGV-----                                                  | APWLVRKPCSELREQVGLTFLISLEDKSKTEEIIITLTRYTQMEG   | 567               |     |
|          | * * :*: . * . . : :*: * *****: * :*:** *                      |                                                 |                   |     |
| RVFV_L   | FVSPPEIPKPHKMTSKFPKVLRS                                       | ELQVYLLNCLCRTIQRIAGEPFILKKKDGSI                 | SWGGMF            | 751 |
| 6L42_0_0 | FVSPMPLPKPQKMLGKLDGPLR                                        | TKLQVYLLRKHLDCMVRIASQPFSLIPREGRVEWGGTF          | 672               |     |
| 6Y6K_1_0 | FVSPMPLPKPQKMLGKLDGPLR                                        | TKLQVYLLRKHLDCMVRIASQPFSLIPREGRVEWGGTF          | 627               |     |
|          | ***** :*:** .*: :*:*****. : **:** * :*: .*** *                |                                                 |                   |     |
| RVFV_L   | NPFSGRPLLDMP                                                  | LISCCYNGYFKNKEEETEPSSLSGMYKKIIELEHLRPQSDAFLGYKD | 811               |     |
| 6L42_0_0 | HAISGRST-NLENMVNSWYIGYK                                       | NKEESTELNALGEMYKKIVEMEEDKPSSPEFLGWGD            | 731               |     |
| 6Y6K_1_0 | HAISGRST-NLENMVNSWYIGYK                                       | NKEESTELNALGEMYKKIVEMEEDKPSSPEFLGWGD            | 686               |     |
|          | : :*** :*: :*. * *****.* :*. *****:*. . * . * :*              |                                                 |                   |     |
| RVFV_L   | PELPRMHEFSVSYLKEACNHAKLV                                      | LRSLYQNFMEQIDNQIIRLSGLTLERLATLKATS              | 871               |     |

|          |                                                                                                                            |      |
|----------|----------------------------------------------------------------------------------------------------------------------------|------|
| 6L42_0_0 | TDSPKKHEFSRSFLRAACSSLEREIAQRHGRQWKQNLEERVLRIGTKNILDLASMKATS                                                                | 791  |
| 6Y6K_1_0 | TDSPKKHEFSRSFLRAACSSLEREIAQRHGRQWKQNLEERVLRIGTKNILDASMKATS<br>: *: **** *:*: **: : : . :*::: ::::::::::*:.. .: **::****    | 746  |
| RVFV_L   | NFNENWYVYKDVADKNYTRDKLLVKMSKYASEGKS LAIQKFEDCMRQIESQGCMHICLFK                                                              | 931  |
| 6L42_0_0 | NFSKDWELYSEVQTKEYHRSKLLEKMATLIEKGVMWYIDAVGQAWKA VLDDGCMRICLFK                                                              | 851  |
| 6Y6K_1_0 | NFSKDWELYSEVQTKEYHRSKLLEKMATLIEKGVMWYIDAVGQAWKA VLDDGCMRICLFK<br>**.:*: :.*: *:* *.*** **: . .* * : . : : : :.****:*****   | 806  |
| RVFV_L   | KQQHGGLREIYVMGAEE RIVQS SVETIARSIGKFFASDTLCNP PNKV KIPETHGIRARKQ                                                           | 991  |
| 6L42_0_0 | KNQHGG LREIY VMDANARLV QFGVETMARCVC ELSPHETVANPRLKNS I IENHGLKSARS                                                         | 911  |
| 6Y6K_1_0 | KNQHGG LREIY VMDANARLV QFGVETMARCVC ELSPHETVANPRLKNS I IENHGLKSARS<br>*:*****. *: **: ***:*.:: : : :*:.* * .* *.*::: ..    | 866  |
| RVFV_L   | CKGPVWTCATSD DARKWNQGH FVTKFALMLCEFTS PKWWPLI IRGCSMF TTKRMMMNLY                                                           | 1051 |
| 6L42_0_0 | LGPSIN INSNDAKKWNQ GHYT TKLALVL CWFMPAKFH RFIWAA ISMFRKKMMVDLRF                                                            | 971  |
| 6Y6K_1_0 | LGPSIN INSNDAKKWNQ GHYT TKLALVL CWFMPAKFH RFIWAA ISMFRKKMMVDLRF<br>. :*:**:*****:.**:**:* * *: :* . *** :*:***:*.:         | 926  |
| RVFV_L   | LKILDG HRELDIRDD FVMDL FKAYHGEAEVP WAFK GKTYLET TTGM MQGILHYTSSL LHT                                                       | 1111 |
| 6L42_0_0 | LAHLS-----DPFREAM TD AFHGNREVSW MDKGR TYIKT ETGMMQ GILHFTSSL LHS                                                           | 1023 |
| 6Y6K_1_0 | LAHLSS-----DPFREAM TD AFHGNRDVS WMDKGR TYIKT ETGMMQ GILHFTSSL LHS<br>* *. :*:***: * * **:***:~* *****:*****:               | 979  |
| RVFV_L   | IHQEYIRSLSFKIFNLKV APEMSKSLVCDMMQSGDSSMLISFPADDEKVLTRCKVA AA I                                                             | 1171 |
| 6L42_0_0 | CVQSFYKSYFVSKLKEGY MGE-SISGVVDV IEGSDDS AIMISIRPKSDMDEVSRFFVAN                                                             | 1082 |
| 6Y6K_1_0 | CVQSFYKSYFVSKLKEGY MGE-SISGVVDV IEGSDDS AIMISIRPKSDMDEVSRFFVAN<br>*.: ~* .. :~* * * * *:~*:*****:~*: ..: .*.~* .*          | 1038 |
| RVFV_L   | CFRMKKELGVYLAIYPSEKSTANTDFVMEYNSEFYFHTQHVRPTIRWIAACC SLPEVETL                                                              | 1231 |
| 6L42_0_0 | LLHSV KF LNPLFGIYSSEKSTVNTVYC VEYNSEFHFHRHLVRPTLRWIAASHQISETEAL                                                            | 1142 |
| 6Y6K_1_0 | LLHSV KF LNPLFGIYSSEKSTVNTVYC VEYNSEFHFHRHLVRPTLRWIAASHQISETEAL<br>::~ * *. :.** *****.* : :*****:* : *****:*****. :~*.*:* | 1098 |
| RVFV_L   | VARQEASNLMTSVTEGGGSFLA AI IQQAQCT LH YMLMG MVSEL FLEYK KAVLK WNDP                                                          | 1291 |
| 6L42_0_0 | ASRQEDYSNLLTQCLEGGASFSLTYLIQCAQLLHHYMLLG LCLHPLFGTFMGMLISDPDP                                                              | 1202 |
| 6Y6K_1_0 | ASRQEDYSNLLTQCLEGGASFSLTYLIQCAQLLHHYMLLG LCLHPLFGTFMGMLISDPDP<br>.:***: ***:~* . ***.***: :** ** *****: : ~* : :~* . **    | 1158 |
| RVFV_L   | GLGFFLLDNPYACGLGGFRNFLKAITRTDLQKLYAFFMKVKVGSAA RDWADEDVTIPET                                                               | 1351 |
| 6L42_0_0 | ALGFFLMDNPAFAGGAGFRNFLWRACKTTDLGRKYAYYFNEI-----YRALDA                                                                      | 1250 |
| 6Y6K_1_0 | ALGFFLMDNPAFAGGAGFRNFLWRACKTTDLGRKYAY-----<br>.****:*** ~* .*****:~* . *** : **:                                           | 1195 |
| RVFV_L   | CSVSPGGALILSSSLKWGSRKKFQKLDRDLNIPENWIELINENPEVLYRAPRTGPEILLR                                                               | 1411 |
| 6L42_0_0 | TS---GGTLSHSVMVYWGDRKKYQALLNRMG LPEDWVEQ IDENPGVLYRRANKKELLK                                                               | 1307 |
| 6Y6K_1_0 | -----<br>-----                                                                                                             | 1195 |
| RVFV_L   | IAEKVHSPGVVSSLS SGNVCKVMASAVYFLSATIFEDT---GRPEFNFLDSKYSLLO                                                                 | 1467 |
| 6L42_0_0 | LAEKVHSPGVTSSLSKGHVPRVVAAGVYLLSRHCF-FSSSIH--G----STQKASLIK                                                                 | 1359 |
| 6Y6K_1_0 | -----HVVPRVVAAGVYLL-----<br>:~* :*:~*.*:*                                                                                  | 1209 |
| RVFV_L   | --KMAAYS GFHGFNDMEPEDILFLFPNIEELESLSIVYNKGEIDIIPRVNIRDATQTRV                                                               | 1525 |
| 6L42_0_0 | LLMMSSISAMKHGGS LNPNQERMLFPQAQ EYDRVCTLLEEVEH-----VRERNIVRSRI                                                              | 1413 |
| 6Y6K_1_0 | -----GGS LNPNQERMLFPQAQ EYDRVCTLLEEVEHLTGFVVRERNIVRSRI<br>...*:~: *****:~* : : :~: : . *.*. :*:~:                          | 1257 |
| RVFV_L   | TIFNEQKNLRTSPEKLVSDKWFGTQKSRIGKTTF LAEW EK LK KIV KWLED APEATLAHTP                                                         | 1585 |
| 6L42_0_0 | DLFQEPVDLRCKAEDLVSEVWFG LRKTK LGPRL LKEEWD KL RASFAWLSTD PSETLRDGP                                                         | 1473 |
| 6Y6K_1_0 | DL-----<br>:                                                                                                               | 1259 |
| RVFV_L   | LNNHIQVRNFFARMESKP-RTVRITGAPVKKRSGVSKIAMVIRDHF SRMGHLRGVEDLAG                                                              | 1644 |
| 6L42_0_0 | FLSHVQFRNFI-----SLDN                                                                                                       | 1488 |
| 6Y6K_1_0 | -----RSVRLL-----GAP---<br>*                                                                                                | 1268 |
| RVFV_L   | FTRSVAEILKHFLFCILQGPYESYKLQLIYRVLSSVS NVEIKESDGK-----                                                                      | 1693 |
| 6L42_0_0 | QERLESISILKHVLFMVLNGPYTEEYKLEMIEAFSTL-----                                                                                 | 1529 |

|          |                                                              |      |
|----------|--------------------------------------------------------------|------|
| 6Y6K_1_0 | -----TIS---QVVRM-----NFFPGFSLE-----<br>: . :.: : :.:*****    | 1285 |
| RVFV_L   | -----TKTNLIGILQRFLD--GDHVVPPIEEMGAGTVGGFIKRQQSK              | 1733 |
| 6L42_0_0 | -----RTMTLCLLSN-----SILDQIERAQSGTLGGFSKPQ-KT                 | 1559 |
| 6Y6K_1_0 | -----<br>***** **                                            | 1285 |
| RVFV_L   | V--VQNKVYYYGVGIWRGFMDGY-QVHLEIENDIGQPPRLRNVTTNCQSSPWDLSIPIRQ | 1790 |
| 6L42_0_0 | FIRPGGGVGYKKGVTGVME-DTHVQILIDGD-GTSNWLEEIRLSSDARLYDVIESIRR   | 1617 |
| 6Y6K_1_0 | -----                                                        | 1285 |
| RVFV_L   | WAEDMGVTNNQDYSSKSSRGARYWMHSFRMQG-PSKPFGCPVYIIKGDMSDVIRLRK--- | 1846 |
| 6L42_0_0 | LCDDLGINNRVASAYRGHCMVR--LSGFKIKPASRTD-GCPVRI---MERGFRIRELQN  | 1670 |
| 6Y6K_1_0 | -----                                                        | 1285 |
| RVFV_L   | -EEVEMKVRGSTLNLYTKHSHQDLHILSYTASDNDLSPGIFKSIISDEGVAQALQLFERE | 1905 |
| 6L42_0_0 | PDEVKMRVRGDILNLSVTIQEGRVMNILSYRPRDTDISESAAAYLWSN--RDLFSFGKKE | 1728 |
| 6Y6K_1_0 | -----                                                        | 1285 |
| RVFV_L   | PSNCWVRCESVAPKFISAILEICEGKRQIKGINRTLSEIVRICSESSLRSKVGSMFSFV  | 1965 |
| 6L42_0_0 | PSCSWICLKT-----ASVLLANDRKTQGIDNRAMGNIFRDCLEGLSLR-KQGLMRSKL   | 1779 |
| 6Y6K_1_0 | -----                                                        | 1285 |
| RVFV_L   | ANVEEAHDVDYDA--LMDLMIEDAKNNAFHVDC-IELDVSGPYEMES-FHGRSTLTCT   | 2021 |
| 6L42_0_0 | TEMVEKNVPLTTQELVDILEEDID---FSDVI-AV-ELS-EGSLDIESIFDGAPIL---  | 1830 |
| 6Y6K_1_0 | -----                                                        | 1285 |
| RVFV_L   | PSTILIRTYTFYLTTHQTMSVQAFQVILDEGVLLIALVNNYLRGSKANCWVRCESVAPK  | 2081 |
| 6L42_0_0 | -----                                                        | 1830 |
| 6Y6K_1_0 | -----                                                        | 1285 |
| RVFV_L   | FISAILEICEGK-RQIK-GINRT-RLSEI-VEFVLNLPKIKSRIYVLICRQCHGANFPPI | 2137 |
| 6L42_0_0 | -----                                                        | 1830 |
| 6Y6K_1_0 | -----<br>* * * *                                             | 1285 |
| RVFV_L   | SVRRLMLEDIASVARRLIIVASFGS*                                   | 2162 |
| 6L42_0_0 | -----*-                                                      | 1830 |
| 6Y6K_1_0 | -----*-                                                      | 1285 |

**Figure S1.** Sequence alignment of RVFV L protein with the templates (Structure of the alpha-Synuclein (PDB ID: 6I42 and severe fever with thrombocytopenia syndrome virus L protein (PDB ID: 6Y6K)).

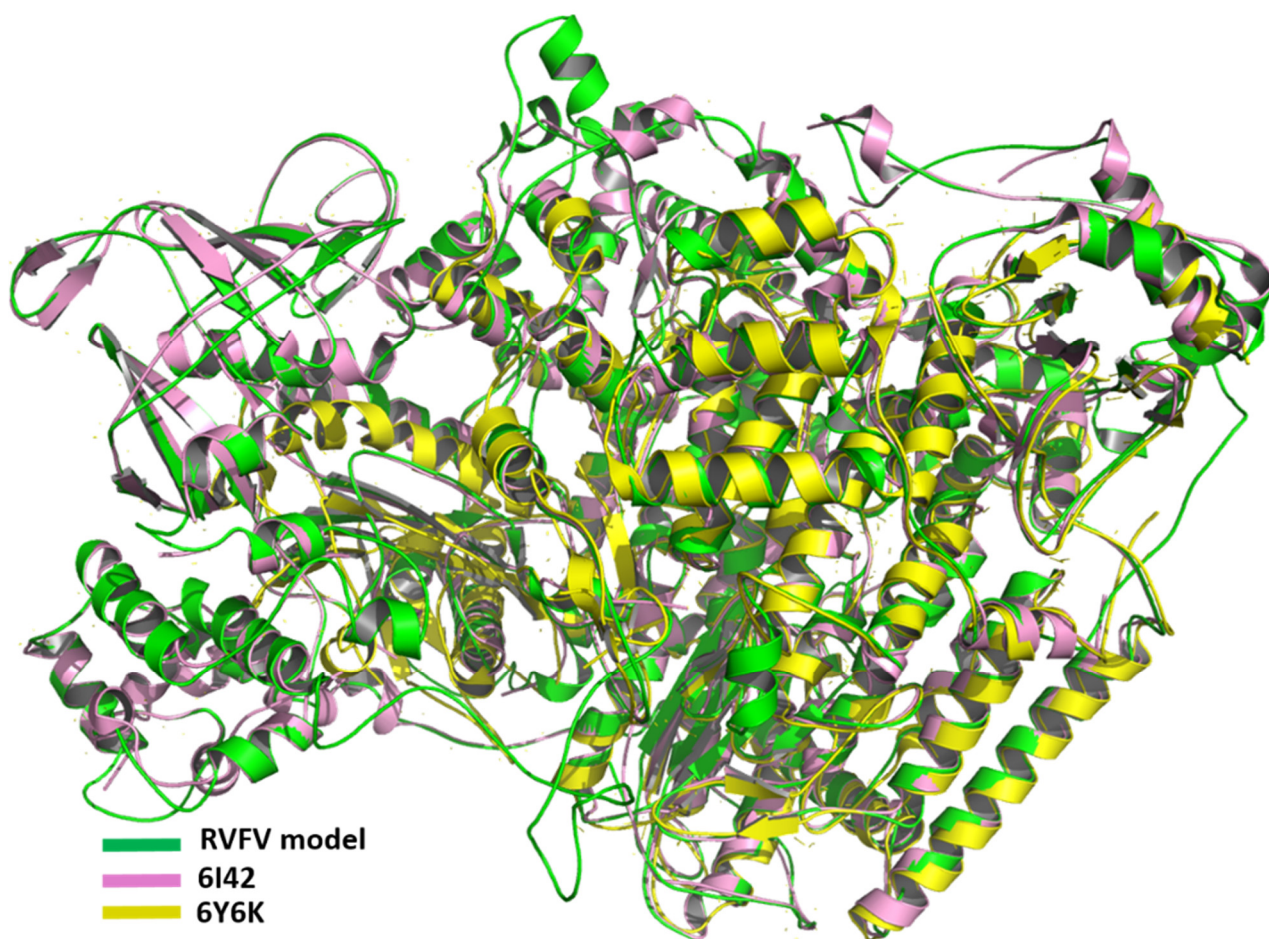

**Figure S2. Structural superposition of the RVFV L protein model with the templates.** The RMSD values between the model and 6I42 and 6Y6K are 0.179 and 1.165 Å, respectively.

**Table S1.** Reverse template comparison of RVFV L protein model with the representative structures in PDB using ProFunc reverse template search program.

| Hit no. <sup>a</sup> | Matched PDB entry | E-value | RMSD (Å) <sup>b</sup> | Similarity score | Seq id (%) | Structural attributes               |                           |
|----------------------|-------------------|---------|-----------------------|------------------|------------|-------------------------------------|---------------------------|
|                      |                   |         |                       |                  |            | Longest fitted segment <sup>c</sup> | Structural similarity (%) |
| 1                    | 6l42              | 0       | 0.26                  | 702.3            | 32.78%     | 1756/1756                           | 99.9                      |

**Note:** <sup>a</sup> Hit number corresponds to the best ranked hit from PDB (against a representative subset of structures in the PDB).

<sup>b</sup> Root-mean-square-deviation between Cα between templates (in PDB) and RVFV L protein model.

<sup>c</sup> Represents structural significant superimposition between query and template structures, which starts from a sliding window of seven residues lengthwise is slide along the alignment and the C-alpha atoms of the equivalenced residues in both structures through superimposition. The fit gives an rmsd below the cut-off of 3.0Å along the length of the window size, which extends until that cut-off.

**Table S2.** Virtual Screening result of Selleckchem Nucleoside Analogue Library (compounds with binding affinity > -1.5 kcal/mol) against model of RVFV-L RdRp core.

| No. | Ligand                             | Binding Energy (kcal/mol) |
|-----|------------------------------------|---------------------------|
| 1   | VER155008                          | -9.6                      |
| 2   | S9012 Khasianine                   | -9.1                      |
| 3   | A-317491                           | -8.7                      |
| 4   | S9430 Tomatidine                   | -8.7                      |
| 5   | LLY-283                            | -8.5                      |
| 6   | Cilostazol                         | -8.4                      |
| 7   | S5461 Cimicifugoside               | -8.4                      |
| 8   | etravirine                         | -8.4                      |
| 9   | Guanosine.                         | -8.3                      |
| 10  | NADIDE                             | -8.3                      |
| 11  | S5402 Dasabuvir(ABT-333)           | -8.3                      |
| 12  | Fludarabine                        | -8.1                      |
| 13  | S4994 Methylcobalamin              | -8.1                      |
| 14  | SGC_0946                           | -8.1                      |
| 15  | S5109 Ademetionine                 | -8                        |
| 16  | S5246 Entecavir.cdx uff E=616.44   | -8                        |
| 17  | CGS-21680 hydrochloride            | -7.9                      |
| 18  | Dapivirine                         | -7.9                      |
| 19  | S5358 Regadenoson                  | -7.9                      |
| 20  | S9007 2-Deoxyguanosine monohydrate | -7.9                      |
| 21  | 6688                               | -7.8                      |
| 22  | Dibutyryl-cAMP                     | -7.8                      |
| 23  | S3641 Osalmid                      | -7.8                      |
| 24  | S3757 2'-Deoxyinosine              | -7.8                      |
| 25  | S5215 Abacavir                     | -7.8                      |
| 26  | 8-Bromo-cAMP                       | -7.7                      |
| 27  | Clevudine                          | -7.7                      |
| 28  | Capecitabine (Xeloda)              | -7.6                      |

|    |                                               |      |
|----|-----------------------------------------------|------|
| 29 | N6-methyladenosine                            | -7.6 |
| 30 | Blasticidin S hydrochloride                   | -7.5 |
| 31 | Puromycin dihydrochloride                     | -7.5 |
| 32 | Sofosbuvir(PSI-7977)                          | -7.5 |
| 33 | CELLCEPT (mycophenolate mofetil)              | -7.4 |
| 34 | EPZ004777                                     | -7.4 |
| 35 | Fludara (Fludarabine Phosphate)               | -7.4 |
| 36 | Ribothymidine Thymine riboside                | -7.4 |
| 37 | Rilpivirine                                   | -7.4 |
| 38 | S3610 Cordycepin                              | -7.4 |
| 39 | S9366 5-Adenylic acid.                        | -7.4 |
| 40 | DIDANOSINE (didanosine)                       | -7.3 |
| 41 | Doxifluridine.cdx uff E=510.10                | -7.3 |
| 42 | S5259Nicotinamide Mononucleotide              | -7.3 |
| 43 | S5374 5'-Cytidylic acid                       | -7.3 |
| 44 | S9368 ADP                                     | -7.3 |
| 45 | Spongouridine 1-beta-D-Arabinofuranosyluracil | -7.3 |
| 46 | TRIFLURIDINE (trifluridine)                   | -7.3 |
| 47 | VIDAZA (azacitidine)                          | -7.3 |
| 48 | valganciclovir hydrochloride                  | -7.3 |
| 49 | 6-Thio-dG                                     | -7.2 |
| 50 | Arranon (Nelarabine)                          | -7.2 |
| 51 | DEPOCYT (cytarabine)                          | -7.2 |
| 52 | Inosine                                       | -7.2 |
| 53 | S4984 2-Cyclouridine                          | -7.2 |
| 54 | S5009 Brivudine                               | -7.2 |
| 55 | S5582 Cytarabine hydrochloride                | -7.2 |
| 56 | S5678 trans-Zeatin-riboside                   | -7.2 |
| 57 | S9369 Xanthosine Dihydrate                    | -7.2 |
| 58 | untitled                                      | -7.2 |
| 59 | Floxuridine                                   | -7.1 |
| 60 | Gemcitabine hydrochloride                     | -7.1 |
| 61 | Ribavirin                                     | -7.1 |
| 62 | S3737 Cangrelor Tetrasodium                   | -7.1 |
| 63 | TYZEKA (telbivudine)                          | -7.1 |
| 64 | Clofarabine                                   | -7   |
| 65 | Cyclocytidine hydrochloride                   | -7   |
| 66 | Penciclovir                                   | -7   |
| 67 | S9275 Isoguanosine                            | -7   |
| 68 | Stavudine                                     | -7   |
| 69 | VIRA-A (vidarabine)                           | -7   |
| 70 | S5505 2-deoxyuridine                          | -6.9 |
| 71 | Uridylic acid                                 | -6.9 |
| 72 | aicar                                         | -6.9 |
| 73 | decitabine (2-deoxy-5-azacytidine)            | -6.9 |
| 74 | Acyclovir                                     | -6.8 |
| 75 | Adenosine                                     | -6.8 |

|     |                                                    |      |
|-----|----------------------------------------------------|------|
| 76  | Cladribine                                         | -6.8 |
| 77  | 5-Iodotubercidin                                   | -6.7 |
| 78  | S4685 Efavirenz                                    | -6.7 |
| 79  | TAS-102                                            | -6.7 |
| 80  | Tubercidin                                         | -6.7 |
| 81  | Ganciclovir                                        | -6.6 |
| 82  | HIVID (zalcitabine)                                | -6.6 |
| 83  | NEVIRAPINE (nevirapine)                            | -6.6 |
| 84  | NSC23766                                           | -6.6 |
| 85  | 6853                                               | -6.5 |
| 86  | Azaguanine-8                                       | -6.5 |
| 87  | Emtricitabine                                      | -6.5 |
| 88  | Ftorafur                                           | -6.5 |
| 89  | GEMCITABINE (gemcitabine)                          | -6.5 |
| 90  | 5-Methyldeoxycytidine                              | -6.4 |
| 91  | 5110                                               | -6.4 |
| 92  | Mizoribine                                         | -6.4 |
| 93  | S5362 Citicholine                                  | -6.4 |
| 94  | Zidovudine                                         | -6.4 |
| 95  | Bromodeoxyuridine                                  | -6.3 |
| 96  | S4803 Thymidine                                    | -6.3 |
| 97  | Uridine                                            | -6.3 |
| 98  | Cytidine                                           | -6.2 |
| 99  | EPIVIR (lamivudine)                                | -6.2 |
| 100 | Idoxuridine                                        | -6.2 |
| 101 | S5307 2-deoxy-2-fluoro-2-C-methyluridine           | -6.2 |
| 102 | SQ22536                                            | -6.2 |
| 103 | Zebularine                                         | -6.1 |
| 104 | vistonuridine                                      | -6.1 |
| 105 | LM-3264 Triapine                                   | -6   |
| 106 | 5143 uff E=60.88                                   | -5.6 |
| 107 | Adrucil (Fluorouracil)                             | -5.5 |
| 108 | Hypoxanthine                                       | -5.5 |
| 109 | S4785 Nicotinamide N-oxide                         | -5.3 |
| 110 | S3651 4-Amino-5-imidazolecarboxamide               | -5.1 |
| 111 | Hydroxyurea                                        | -4.1 |
| 112 | S5016 Isoprinosine                                 | -3.8 |
| 113 | s4515 Ademetionine Ademetionine disulfate tosylate | -3.7 |
| 114 | 2416                                               | -3.6 |
| 115 | 5383                                               | -3.6 |
| 116 | Entecavir hydrate                                  | -1.8 |
| 117 | S9351 2-Deoxyadenosine monohydrate                 | -1.8 |
| 118 | S5284 Adenosine 5-monophosphate monohydrate        | -1.7 |
| 119 | S5297 Vidarabine monohydrate                       | -1.7 |
